# Supplementary material for: Computer-Based Annotation of Putative AraC/XylS-Family Transcription Factors of Known Structure but Unknown Function
Source: Hindawi journal article supplement (doi:10.1155/2012/103132), 2012-01-01
Supplement: f1 [file 103132.f1.docx]

**Supplementary Material**


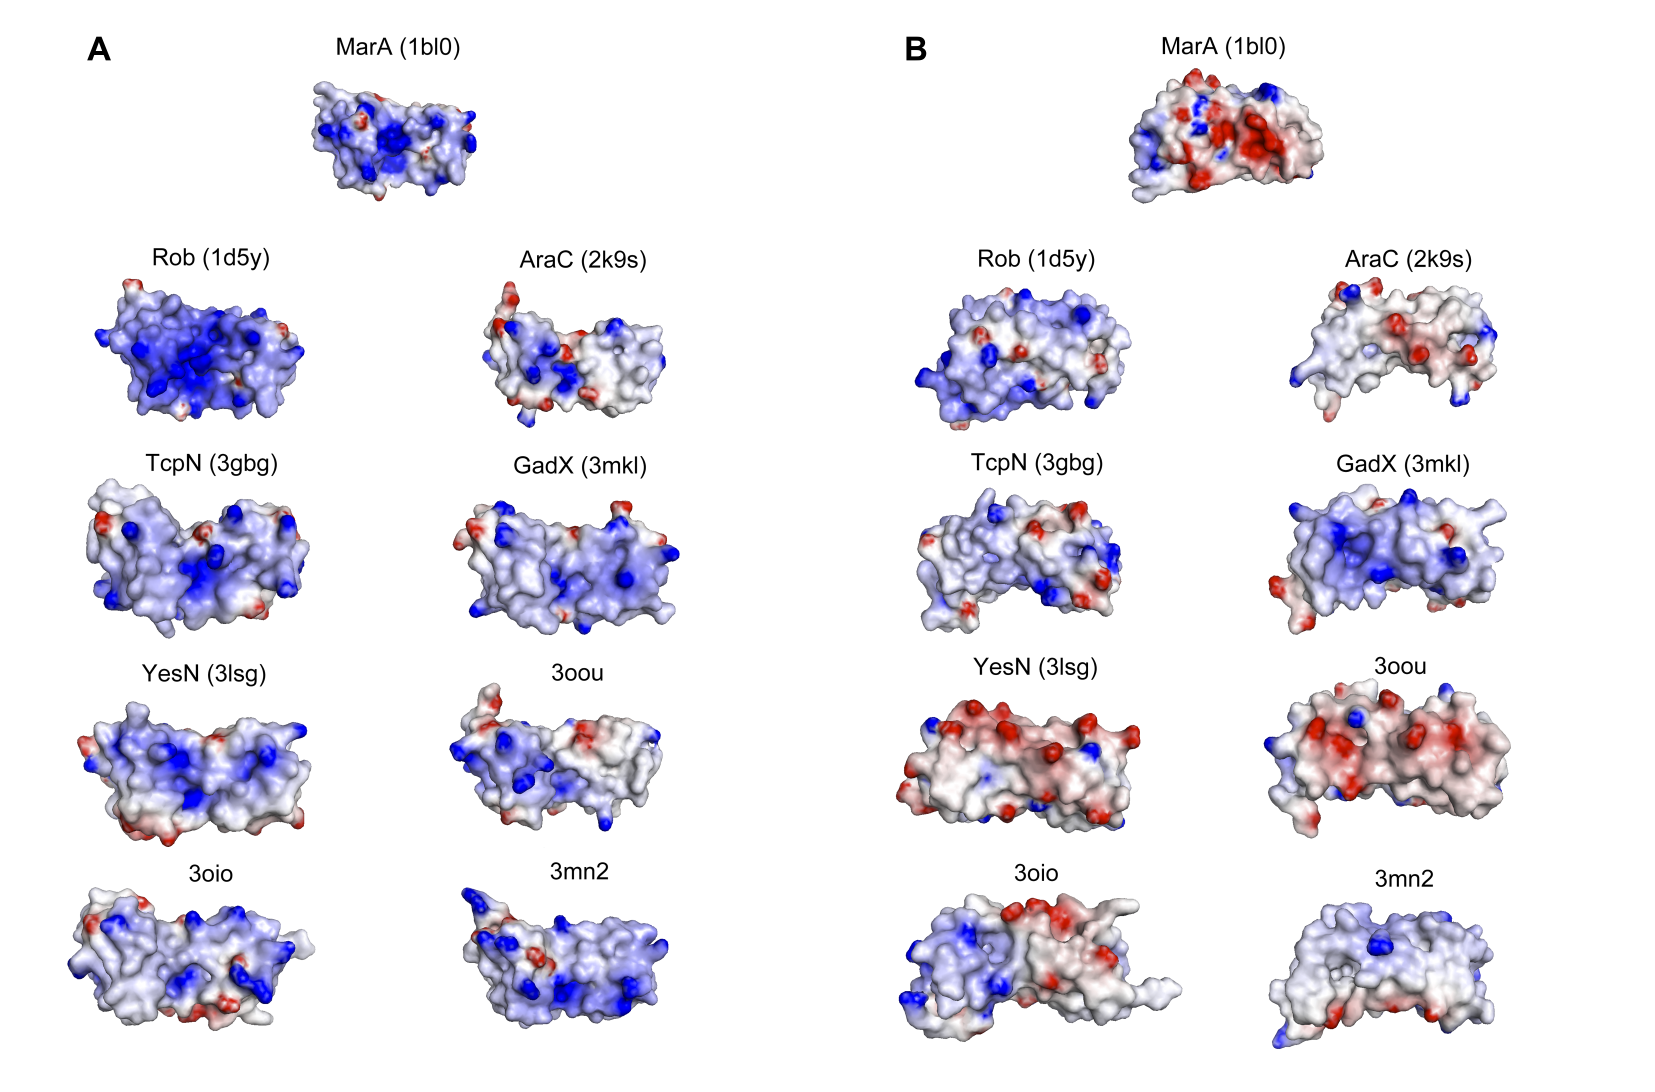


**Figure S1.** Electrostatic potential surface representations of AraC/XylS family members. The electrostatic potentials were calculated with the software DelPhi version 4 release 1.1 and the surfaces and images were generated with PyMOL. A) View on the side of the proteins facing DNA. B) View on the opposite side of the protein, by rotation of the proteins by 180 degrees. Blue color indicates a positive potential, red color indicates a negative potential and white color indicates a neutral potential.


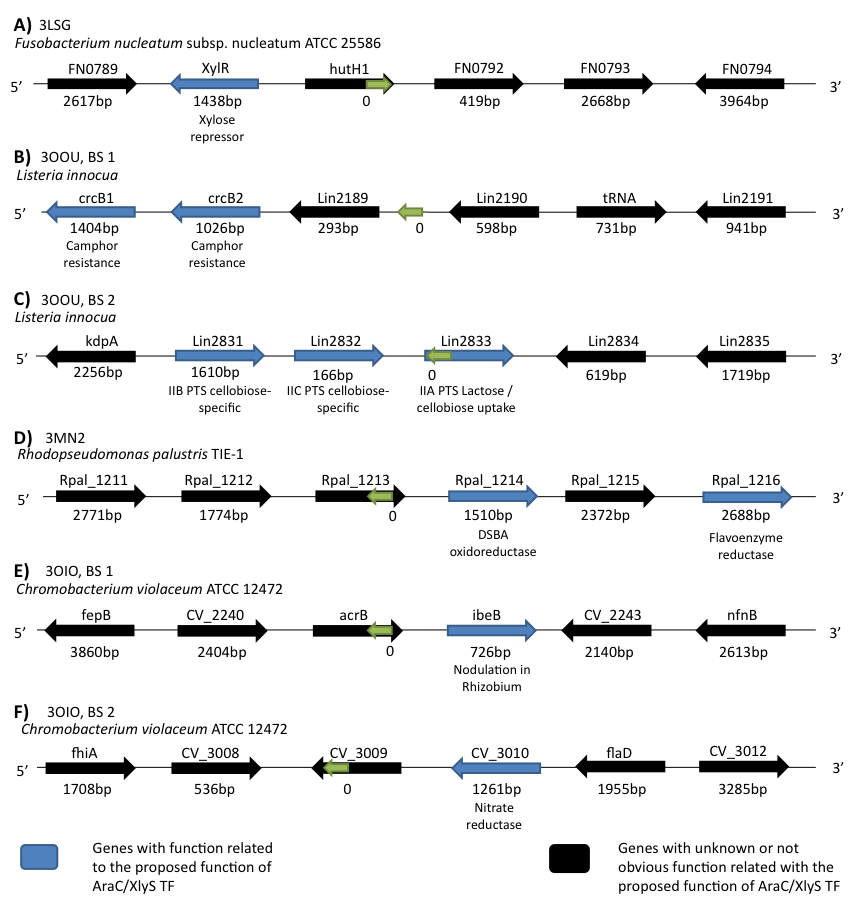


**Figure S2**. Genetic context of predicted binding sites of the uncharacterized AraC/XlyS transcription factors. Distance (in base pairs) from the hypothetical binding site is provided for each gene. In blue are genes with a function related with the proposed biological role of the AraC/XylS transcription factor. In black, genes with unknown or not obviously related function. In the majority of the cases, the function of these genes was obtained by sequence similarity to other genes or by the annotation of the InterPro database for their families.

**Table S1.** List of 62 well-characterized AraC/XylS-family transcriptional regulators with known biological function

| **Proteina** | **Organism** | **Biol. proccessb** | **Regulatory function** | **Categoryc** | **Ref.d** |
| --- | --- | --- | --- | --- | --- |
| AarP (P43463) | *Providencia stuartii* | Antibiotic resistance | Regulates the transcription of 2'-N-acetyltransferase, which is capable of acetylating both peptidoglycan and certain aminoglycoside antibiotics. | S + V | 7768849, 10390241 |
| Ada (P06134) | *Escherichia coli (strain K12)* | DNA damage response | Repairs O6-methylguanine and O4-methylthymine and induces transcription of genes involved in the adaptive response to alkylation damage in DNA | S + V | 3529081 |
| Ada (P26189) | *Salmonella typhimurium* | DNA damage response | Repairs O6-methylguanine and O4-methylthymine and induces transcription of genes involved in the adaptive response to alkylation damage in DNA | S + V | 1904855 |
| AdaA (P19219) | *Bacillus subtilis* | DNA damage response | Repairs O6-methylguanine and O4-methylthymine and induces transcription of genes involved in the adaptive response to alkylation damage in DNA | S + V | 8376346, 2120677 |
| AdiY (P33234) | *Escherichia coli (strain K12)* | Acid resistance | Regulates arginine-dependent acid resistance, is involved in glutamate-dependent response to acid stress, and is associated with activation of virulent strains of E. coli in the stomage | S + V | 8795195, 21034467 |
| AggR (P43464) | *Escherichia coli* | Cell adhesion | Transcriptional activator of aggregative adherence fimbria I expression in enteroaggregative E. coli | V | 7913930 |
| AlkR (O31249) | *Acinetobacter sp. (strain ADP1)* | Alkane metabolism | Activates the expression the alkane 1-monooxygenase that permits the use of alkanes with at least twelve carbon atoms as the sole source of carbon and energy | M | 9811637 |
| AppY (P05052) | *Escherichia coli (strain K12)* | Phosphate starvation response | Induces the synthesis of acid phosphatase (AppA) and several other polypeptides (such as AppBC) during the deceleration phase of growth in response to phosphate starvation. Also involved in the stabilization of the sigma stress factor RpoS during stress conditions | S | 18383615 |
| AraC (P07642) | *Erwinia chrysanthemi* | Plant carbohydrates metabolism | Controls the expression of at least six genes that are involved in the transport and catabolism of L-arabinose an aldopentose sugar found in plant gums, pectins and bacterial cell wall polysaccharides | M | 3902795 |
| AraC (P0A9E0) | *Escherichia coli (strain K12)* | Plant carbohydrates metabolism | Controls the expression of at least six genes that are involved in the transport and catabolism of L-arabinose an aldopentose sugar found in plant gums, pectins and bacterial cell wall polysaccharides | M | 12596232 |
| Caf1R (P26950) | *Yersinia pestis* | Capsule formation | Regulates the caf1M1A1 operon. The caf operon products constitute a fimbrial chaperone-usher system that acts to assemble and export F1 capsule components | V | 1633857, 19103769 |
| CfaD (P25393) | *Escherichia coli* | Cell adhesion | Transcriptional activator of the CFA/I adhesin (cfAA) gene of enterotoxigenic E. coli | V | 1971911 |
| ChbR (P17410) | *Escherichia coli (strain K12)* | Carbohydrates metabolism | Regulates the expression of the chbBCARFG operon for the uptake and metabolism of chitobiose (the major breakdown product of chitin degradation) | M | 15066032 |
| CsvR (P43460) | *Escherichia coli* | Cell adhesion | Transcriptional activator of the fimbrial gene in enterotoxigenic E. coli | V | 1685133 |
| EnvY (P10805) | *Escherichia coli (strain K12)* | Temperature stress response | Regulates the temperature-dependent expression of several E. coli envelope proteins, most notably the porins ompF and ompC and the lambda receptor, lamB | S | 2536924 |
| EutR (P36547) | *Escherichia coli (strain K12)* | Amine metabolism | Activates the transcription of the eut operon, neccesary for uptake and metabolism of ethanolamine. It was suggested that the breakdown of ethanolamine contributes to disrupting gut functions, in particular innate immune functions | M + V | 20234377 |
| ExsA (P26993) | *Pseudomonas aeruginosa* | Type III secretion system | Promotes the expresion of type III secretion system in response of low levels of Ca2+ | V | 16714561, 9618447, 11119548 |
| FapR (P23774) | *Escherichia coli* | Cell adhesion | Regulates the expression of the 987P operon for the fimbrial protein in enterotoxygenic E. coli | V | 2077360 |
| FeaR (Q47129) | *Escherichia coli (strain K12)* | Amine metabolism | Regulates tynA/maoA and feaB/padA genes necessary for 2-phenylethylamine catabolism | M | 9043126 |
| GadW (P63201) | *Escherichia coli (strain K12)* | Acid resistance | GadW regulates the gadA and gadBC genes that regulate acid tolerance and virulence gene expression in response to environmental cues within the gastrointestinal tract | S + V | 12730179 |
| GadX (Q9EYV5) | *Escherichia coli O127:H6* | Cell adhesion, Type III secretion system, Acid resistance | GadX regulates perABC and gadA and gadB, that regulate acid tolerance and virulence gene expression in response to environmental cues within the gastrointestinal tract | S + V | 17576759 |
| HilD (P0CL08) | *Salmonella typhimurium* | Type III secretion system | Regulates the expression of the main transcriptional regulator of the Salmonella pathogenicity island 1 (SPI1) hilA | V | 11442828 |
| HrpB (P31778) | *Ralstonia solanacearum (Pseudomonas solanacearum)* | Type III secretion system | Regulates the hrp operon. hrp genes encode a specialized type III secretion system | V | 12374732 |
| InvF (P69343) | *Salmonella typhimurium* | Type III secretion system | Regulates the expression of genes encoding the secreted effector molecules Sip/Ssp ABCD, SigD, SptP and SopE, necessary for type III secretion system | V | 11296219 |
| LacR (O33813) | *Staphylococcus xylosus* | Mammalian carbohydrates metabolism | Regulates the expression of lacPH (lactose permease and the beta-galactosidase) genes for lactose utilization | M | 9573174 |
| LumQ (Q51872) | *Photobacterium leiognathi* | Riboflavin synthesis and/or luminescence | Probably regulates the riboflavin synthesis and/or luminescence. Is encoded in the lux operon that is linked to the luminescence genes in some photobacterium species | M | 17586644 |
| MarA (P0ACH5) | *Escherichia coli (strain K12)* | Antibiotic resistance | Regulates the expression of the mar regulon that confers resistance to a variety of antibiotics | S + V | 9333027, 11104814 |
| MelR (P0ACH8) | *Escherichia coli (strain K12)* | Plant carbohydrates metabolism | Transcriptional activator for the expression of the melAB operon in response to the availability of melibiose | M | 16621812 |
| MmsR (P28809) | *Pseudomonas aeruginosa* | Amino acid metabolism | Regulates the expression of the mmsAB operon. The operon contains two structural genes involved in valine metabolism | M | 1339433 |
| MsmR (Q00753) | *Streptococcus mutans* | Plant carbohydrates metabolism | Regulates the expression of the msm operon responsible for the transport and metabolism of melibiose, raffinose, and isomaltosaccharides | M | 1537846, 8432594 |
| MxiE (P0A2S7) | *Shigella flexneri* | Type III secretion system | Controls transcription of a set of genes encoding proteins that transit through the type III secretion system apparatus. | V | 16428428 |
| OruR (P72171) | *Pseudomonas aeruginosa* | Amino acid metabolism | Regulates the expression of genes involved in ornithine metabolism | M | 9401045 |
| PchR (P40883) | *Pseudomonas aeruginosa* | Iron stress | Regulates the expression of pyoverdin and pyochelin siderophores (iron chelators) which contribute to virulence | S + V | 10722571, 15375116 |
| PerA (P43459) | *Escherichia coli O127:H6* | Cell adhesion | Regulates the expression of the eaeA gene that is associated with attaching and effacing lesions and encodes intimin, a 94-kDa outer membrane protein | V | 7729884 |
| PocR (Q05587) | *Salmonella typhimurium* | Carbohydrates metabolism | Regulates the expression of pdu and cob operons that regulate the meabolism of the L-fucose subproduct anaerobic metabolite 1,2-propanediol | M | 8071226 |
| PqrA (Q52620) | *Proteus vulgaris* | Antibiotic resistance, Oxidative stress response | Confers multidrug resistance in a way similar to that of the soxS and marA genes in E. coli | S + V | 7726514 |
| RafR (P43465) | *Pediococcus pentosaceus* | Plant carbohydrates metabolism | Regulates the raffinose operon. Raffinose is a trisaccharide composed of galactose, fructose, and glucose found in many plants | M | 2180920 |
| RamA (P55922) | *Enterobacter cloacae* | Antibiotic resistance | Is Involved in resistance to multiple antibiotics through the expression regulation of the OmpF porin and the efflux pump AcrAB | S + V | 21811569 |
| RhaR (P09378) | *Escherichia coli (strain K12)* | Plant carbohydrates metabolism | Regulates the rhaBAD operon that encode enzymes for catabolism of rhamnose | M | 8757746 |
| RhaS (P09377) | *Escherichia coli (strain K12)* | Plant carbohydrates metabolism | Regulates the rhaBAD operon that encode enzymes for catabolism of rhamnose | M | 8230210 |
| RhrA (Q9Z3Q6) | *Rhizobium meliloti (Ensifer meliloti)* | Activation of siderophores, Iron stress | Regulates the transcription of the rhbABCDEF operon involved in biosynthesis of rhizobactin 1021, a siderophore produced under iron stress. Also regulates the rhtA gene which encodes an membrane receptor protein for rhizobactin 1021 | BPI + S | 11274118 |
| RipA (Q8NRR3) | *Corynebacterium glutamicum* | Iron stress response | Under iron limitation, RipA acts as a repressor of several genes encoding prominent iron-containing proteins (e.g. aconitase and succinate dehydrogenase) | S | 21217007, 16179344 |
| Rns (P16114) | *Escherichia coli* | Cell adhesion | Regulates the expression of the CS1 and CS2 adhesins | V | 2563591 |
| Rob (P0ACI0) | *Escherichia coli (strain K12)* | Antibiotic resistance | Regulates the expression of genes that confer multiple antibiotic resistance. Overexpression causes antibiotic resistance, organic solvent tolerance and heavy metal resistance | S + V | 7896685, 7793951 |
| SirC (Q8Z4A6) | *Salmonella typhi* | Type III secretion system | Regulates the expression of the invasion-associated type III secretion system encoded within the SPI-1 plasmid | V | 10322010 |
| SoxS (P0A9E2) | *Escherichia coli (strain K12)* | Oxidative stress response | Regulates the transcriptional activation of a complex oxidative stress regulon in response to superoxide-generating agents | S + V | 1653416, 7726514 |
| TcpN (P0C6D6) | *Vibrio cholerae* | Pilus formation | Regulates the tcp gene cluster, associated with the biosynthesis and assembly of the toxin-coregulated pilus | V | 1352761 |
| TetD (P28816) | *Escherichia coli* | Antibiotic resistance | Regulates the transcripcion of the mar regulon that confers the multiple antibiotic resistance phenotype | S + V | 6094472, 9333027 |
| ThcR (P43462) | *Rhodococcus erythropolis (Arthrobacter picolinophilus)* | Organosulfur compound metabolism | Regulates the transcription of the thc operon for the degradation of the thiocarbamate herbicide EPTC | M | 7836301 |
| UreR (P32326) | *Escherichia coli* | Urease activation | Regulates the expression of the urease operon, related with uropathogenic strains of E. coli and Proteus mirabilis | V | 11724879, 11119505 |
| UreR (Q02458) | *Proteus mirabilis (strain HI4320)* | Urease activation | Regulates the expression of the urease operon, related with uropathogenic strains of E. coli and Proteus mirabilis | V | 7678244, 18202436 |
| VirF (P0A2T1) | *Shigella flexneri* | Type III secretion system | Primary regulator of plasmid-encoded virulence genes. VirF activates the second essential virulence plasmid regulator VirB (type III secretion system) and the actin nucleator protein IcsA | V | 18202440 |
| VirF (P0C2V5) | *Yersinia enterocolitica* | Type III secretion system | Transcriptional activator of the Yersinia Yop virulence regulon that encodes 11 different secreted antihost proteins called Yops, as well as a type III secretion machinery that is required for their secretion | V | 9841674, 9618447 |
| VqsM (Q9I1P2) | *Pseudomonas aeruginosa* | Quorum sensing | Regulates dozens of genes which are implicated in quorum sensing, virulence and multidrug resistance | V | 16194239 |
| XylR (P0ACI3) | *Escherichia coli (strain K12)* | Plant carbohydrates metabolism | Regulatory protein for the xylBAFGHR operon involved in the transport and metabolism of D-xylose | M | 9371449 |
| XylS (P07859) | *Pseudomonas putida (Arthrobacter siderocapsulatus)* | Benzene derivatives metabolism | Regulates the xylXYZLTEGFJQKIH operon of TOL plasmid, required for the degradation of toluene, m-xylene and p-xylene | M | 18296514 |
| XylS1 (Q04713) | *Pseudomonas putida* | Benzene derivatives metabolism | Regulates the xylXYZLTEGFJQKIH operon of TOL plasmid, required for the degradation of toluene, m-xylene and p-xylene | M | 8473862 |
| XylS2 (Q05092) | *Pseudomonas putida* | Benzene derivatives metabolism | Regulates the xylXYZLTEGFJQKIH operon of TOL plasmid, required for the degradation of toluene, m-xylene and p-xylene | M | 1331988 |
| XylS3 (Q05335) | *Pseudomonas putida* | Benzene derivatives metabolism | Regulates the xylXYZLTEGFJQKIH operon of TOL plasmid, required for the degradation of toluene, m-xylene and p-xylene | M | 8473862 |
| Y4fK (P55449) | *Rhizobium sp. (strain NGR234)* | Nodulation induction | Regulates the nod operon that controls nodulation factors that promote nitrogen fixation in symbiotic bacteria-plant interaction | BPI | 9669339 |
| YesN (O31517) | *Bacillus subtilis* | Plant carbohydrates metabolism | Probably activates the expression of genes that regulate the metabolism of plant cell wall polysaccharides | M | 17921311, 19651770 |
| YesS (O31522) | *Bacillus subtilis* | Plant carbohydrates metabolism | Probably regulates the pathway involve in rhamnogalacturonan (plant cell wall polysaccharides) depolymerization | M | 17449691 |

a Protein name and UniProt accession number in parenthesis.

b General biological process. Multiple processes are separated by a comma.

c Functional category: Bacteria-plant interaction (BPI), metabolism (M), stress response (S) and virulence (V).

d PubMed ID of references describing the biological function.

**Table S2.** Details of the analysis of the genetic context for predicted binding sites of the uncharacterized AraC/XlyS transcription factors.

| **PDB structure** | **3mn2** | **3oio** | | **3lsg** | **3oou** | |
| --- | --- | --- | --- | --- | --- | --- |
| **Organism** | Rhodopseudomonas palustris TIE-1 | Chromobacterium violaceum ATCC 12472 | Chromobacterium violaceum ATCC 12472 | Fusobacterium nucleatum subsp. nucleatum ATCC 25586 | Listeria innocua | Listeria innocua |
| **Genome strand of Binding Site** | - | - | - | + | - | - |
| **Binding Site start / end** | 1283534 / 1283555 | 3284826 / 3284847 | 2429687 / 2429708 | 1447985 / 1448006 | 2208002 / 2208023 | 2849441 / 2849462 |
| **Binding Site sequence** | GATCTGCCCGAGGGCGCCACGC | AGGCGCACCAGCTCCTTGACGA | GATGACGCCGTTTTCCGCCTTC | TCTGGATTCATGATAGTTCAAT | TCAAATAAAGGATCCCCGAACT | AGACGAACAAATCGCCCAAGCA |
| **Gene 1** | Locus: Rpal_1214 / UniProtKB: B3QHJ6 | Gene: ibeB / UniProtKB: Q7NVV0 | Locus: CV_3010 / UniProtKB: Q7NTP4 | Locus: FN0792 / Uniprot: Q8RFC1 | Locus: lin2190 / Uniprot: Q929T4 | Locus: 2833 / Uniprot: Q7ANT9 |
| **Genome start / end / strand** | 1285065 / 1285718 / + | 2430434 / 2431813 / + | 3286108 / 3286602 / - | 1448403 / 1450424 / + | 2207728 / 2208621 / - | 2849334 / 2849636 / + |
| **Description** | DSBA oxidoreductase / protein disulfide oxidoreductase activity | Lipoprotein / outer membrane drug efflux lipoprotein | oxidation-reduction process / electron carrier activity | urocanate hydratase | Aminoglycoside 3'-phosphotransferase | IIA PTS Lactose / cellobiose uptake / enzyme IIA |
| **Distance from sequence** | 1510 | 726 | 1261 | 419 | 598 | 0 |
| **Gene 2** | Locus: Rpal_1215 / UniProtKB: B3QHJ7 | Locus: CV_2243 / UniProtKB: Q7NVU9 | Gene: flaD / UniProtKB: Q7NTP3 | Locus: FN0793 / Uniprot: Q8RFC0 | tRNA | Locus: lin2834 / Uniprot: Lin2834 protein |
| **Genome start / end / strand** | 1285927 / 1286238 / + | 2431827 / 2432282 / - | 3286802 / 3287920 / - | 1450652 / 1451851 / + | 2208754 / 2208837 / + | 2850081 / 2851184 / - |
| **Description** | hypothetical protein | conserved hypothetical protein | ciliary or flagellar motility / structural molecule activity | L-glutamato Transporter | tRNA | Family FtsW_RodA_SpoVE  Implicated in Cell division |
| **Distance from sequence** | 2372 | 2140 | 1955 | 2668 | 731 | 619 |
| **Gene 3** | Locus: Rpal_1216 / UniProtKB: B3QHJ8 | Gene: nfnB / UniProtKB: Q7NVU8 | Locus: CV_3012 / UniProtKB: Q7NTP2 | Locus: FN0794 / Uniprot: Q8RFB9 | Locus: lin2191 / Uniprot: Q929T3 | Locus: lin2835 / Uniprot: Q927F4 |
| **Genome start / end / strand** | 1286243 / 1287505 / + | 2432321 / 2432974 / - | 3288132 / 3289388 / + | 1451930 / 1452343 / - | 2208964 / 2210244 / - | 2851181 / 2852311 / - |
| **Description** | electron carrier activity / flavin adenine dinucleotide binding / iron ion binding / oxidoreductase activity | oxygen-insensitive NAD(P)H nitroreductase / 6,7-dihydropteridine reductase activity | proteolysis / serine-type carboxypeptidase activity | Unknown | DNA binding protein (HTH motif) | Family FtsW_RodA_SpoVE  Implicated in Cell division |
| **Distance from sequence** | 2688 | 2613 | 3285 | 3964 | 941 | 1719 |
| **Gene 4** | Locus: Rpal_1213 / UniProtKB: B3QHJ5 | Gene: acrB / UniProtKB: Q7NVV1 | Locus: CV_3009 / UniProtKB: Q7NTP5 | Gene: hutH1 / Uniprot: Q8RFC2 | Locus: lin2189 / Uniprot: Q929T5 | Locus: lin2832 / Uniprot: Q927F7 |
| **Genome start / end / strand** | 1281779 / 1285003 / + | 2427309 / 2430437 / + | 3284381 / 3286096 / - | 1446836 / 1448386 / + | 2207105 / 2207731 / - | 2847990 / 2849297 / + |
| **Description** | transporter activity / acriflavin resistance protein | transporter activity / acriflavin resistance protein B | peptidyl-histidine phosphorylation / regulation of transcription, DNA-dependent | Enzyme, catalyzes: L-histidine = urocanate + NH3 | Protein with structural similarity with: Regulation domain of Rob, multidrug effect transporter regulator and heme binding protein2 | PTS, cellobiose uptake / enzyme IIC |
| **Distance from sequence** | 0 | 0 | 0 | 0 | 293 | 166 |
| **Gene 5** | Locus: Rpal_1212 / UniProtKB: B3QHJ4 | Locus: CV_2240 / UniProtKB: Q7NVV2 | Locus: CV_3008 / UniProtKB: Q7NTP6 | Locus: FN0790 / Uniprot: Q8RFC3 | Gene: crcB2 / Uniprot: Q929T6 | Locus: lin2831 / Uniprot: Q927F8 |
| **Genome start / end / strand** | 1280787 / 1281782 / + | 2426145 / 2427305 / + | 3283449 / 3284312 / + | 1445384 / 1446547 / - | 2206609 / 2206998 / - | 2847548 / 2847853 / + |
| **Description** | efflux transporter, RND family, MFP subunit / transmembrane transport | transmembrane transport / probable multidrug efflux protein | regulation of transcription, DNA-dependent / two-component response regulator activity | Xylose repressor | Protein CrcB homolog 2 | PTS Lactose / cellobiose uptake / enzyme IIB |
| **Distance from sequence** | 1774 | 2404 | 536 | 1438 | 1026 | 1610 |
| **Gene 6** | Locus: Rpal_1211 / UniProtKB: B3QHJ3 | Gene: fepB / UniProtKB: Q7NVV3 | Gene: fhiA / UniProtKB: Q7NTP7 | Locus: FN0789 / Uniprot: Q8RFC4 | Gene: crcB1 / Uniprot: Q929T7 | Gene: kdpA / Uniprot: Q927F9 |
| **Genome start / end / strand** | 1280444 / 1280785 / + | 2424881 / 2425849 / - | 3281425 / 3283137 / + | 1444526 / 1445368 / - | 2206263 / 2206619 / - | 2845522 / 2847207 / - |
| **Description** | Transcriptional regulator, ArsR family / sequence-specific DNA binding transcription factor activity / HTH arsR-type DNA-binding domain | high-affinity iron ion transport / ferrienterobactin-binding periplasmic protein precursor | protein secretion | Unknown | Protein CrcB homolog 1 | Potassium-transporting ATPase A chain,l |
| **Distance from sequence** | 2771 | 3860 | 1708 | 2617 | 1404 | 2256 |
